# Supplementary material for: An insight into antagonist binding and induced conformational dynamics of class B GPCR corticotropin-releasing factor receptor 1
Source: Royal Society of Chemistry journal article supplement (doi:10.1039/c5mb00159e), 2015-05-01
Supplement: c5mb00159e1.pdf [file c5mb00159e1.pdf]

## Supporting Information

# Insight into Antagonist Binding and Induced Conformational Dynamics of Class B GPCR Corticotropin-Releasing Factor Receptor 1

Junli Xu,<sup>‡a,b</sup> Zhonghua Wang,<sup>‡a</sup> Pi Liu,<sup>\*a</sup> Dongmei Li,<sup>\*a</sup> and Jianping Lin<sup>\*a,b</sup>

<sup>a</sup> State Key Laboratory of Medicinal Chemical Biology and College of Pharmacy, Nankai University, Tianjin 300071, China

<sup>b</sup> Pharmaceutical Intelligence Platform, Tianjin Joint Academy of Biomedicine and Technology, Tianjin 300457, China

<sup>‡</sup>These authors contributed equally to this work.

### Contents:

- Complete citation of ref 44.
- Fig. S1. Quality of the constructed CP-376395-CRF<sub>1</sub>R model checked by PROCHECK and ERRAT. (A) The Ramachandran plot made by PROCHECK, the most favoured regions (A, B, L) was in red, the additional allowed regions (a, b, l, p) was in brown, the generously allowed regions (~a, ~b, ~c, ~p) was in yellow and the disallowed regions (XX) was in light yellow. (B) The overall quality factor checked by ERRAT.
- Fig. S2. The root-mean-square deviation (RMSD) of the simulated positions of the protein backbone atoms from those in the initial structure vs. simulation time for apo-CRF<sub>1</sub>R, CP-376395-CRF<sub>1</sub>R complex and MTIP-CRF<sub>1</sub>R complex.
- Table S1. Binding free energy decompositions of CP-376395-CRF<sub>1</sub>R and MTIP-CRF<sub>1</sub>R.

---

**Complete citation of ref 44.**

(44) D.A. Case, T.A. Darden, T.E. Cheatham, III, C.L. Simmerling, J. Wang, R.E. Duke, R. Luo, R.C. Walker, W. Zhang, K.M. Merz, B. Roberts, S. Hayik, A. Roitberg, G. Seabra, J. Swails, A.W. Götz, I. Kolossváry, K.F. Wong, F. Paesani, J. Vanicek, R.M. Wolf, J. Liu, X. Wu, S.R. Brozell, T. Steinbrecher, H. Gohlke, Q. Cai, X. Ye, J. Wang, M.-J. Hsieh, G. Cui, D.R. Roe, D.H. Mathews, M.G. Seetin, R. Salomon-Ferrer, C. Sagui, V. Babin, T. Luchko, S. Gusarov, A. Kovalenko, and P.A. Kollman (2012), AMBER 12, University of California, San Francisco.

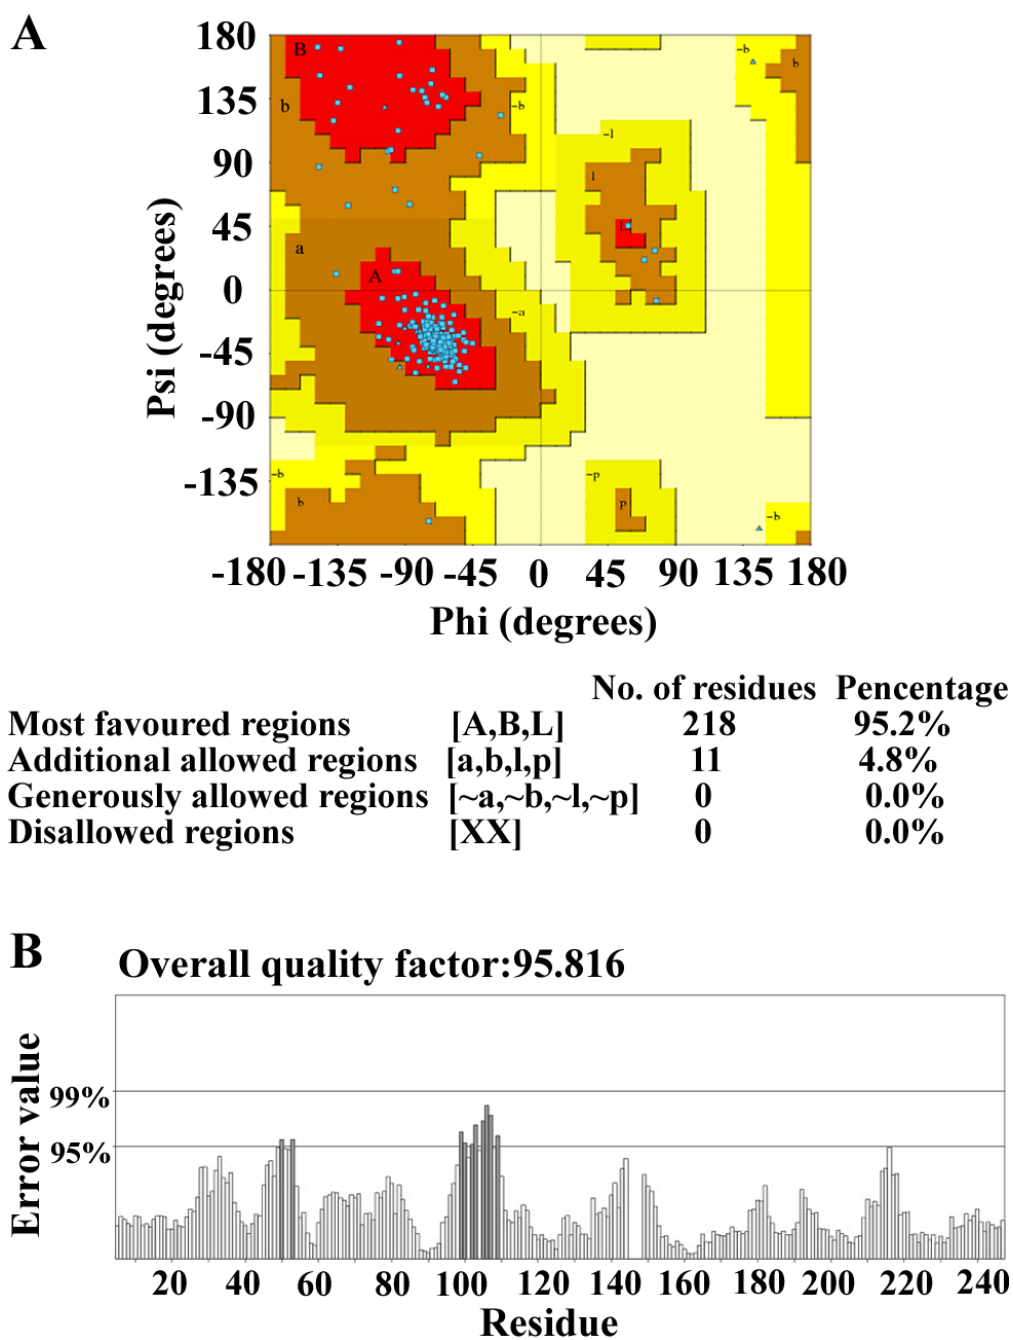

**Fig. S1.** Quality of the constructed CP-376395-CRF<sub>1</sub>R model checked by PROCHECK and ERRAT. (A)

The Ramachandran plot made by PROCHECK, the most favoured regions (A, B, L) was in red, the additional allowed regions (a, b, l, p) was in brown, the generously allowed regions (~a, ~b, ~c, ~p) was in yellow and the disallowed regions (XX) was in light yellow. (B) The overall quality factor checked by ERRAT.

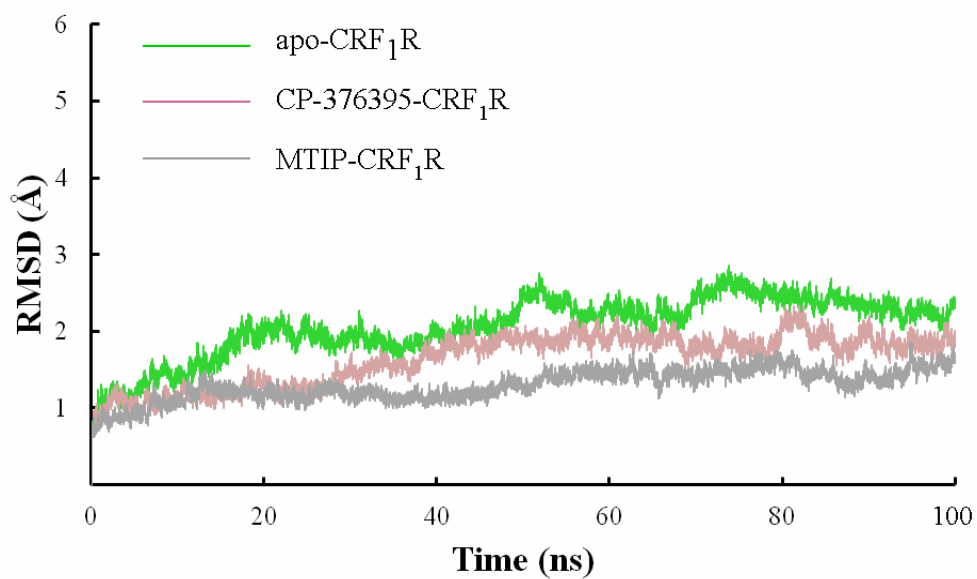

**Fig. S2.** The root-mean-square deviation (RMSD) of the simulated positions of the protein backbone atoms from those in the initial structure vs. simulation time for apo-CRF<sub>1</sub>R, CP-376395-CRF<sub>1</sub>R complex and MTIP-CRF<sub>1</sub>R complex.

**Table S1. Binding free energy decompositions of CP-376395-CRF<sub>1</sub>R and MTIP-CRF<sub>1</sub>R.**

| <b>CP-376395-CRF<sub>1</sub>R</b> |                 |      |                 |      |                   |      |                      |      |                 |      |
|-----------------------------------|-----------------|------|-----------------|------|-------------------|------|----------------------|------|-----------------|------|
| <b>Residue</b>                    | <b>VDW (SD)</b> |      | <b>ELE (SD)</b> |      | <b>POLAR (SD)</b> |      | <b>NONPOLAR (SD)</b> |      | <b>TOT (SD)</b> |      |
| Asn283                            | -2.42           | 0.60 | -5.34           | 0.62 | 3.27              | 0.49 | -0.23                | 0.02 | -4.72           | 0.70 |
| Phe203                            | -2.69           | 0.45 | -0.10           | 0.11 | -0.74             | 0.29 | -0.21                | 0.03 | -3.74           | 0.58 |
| Met206                            | -3.54           | 0.41 | 0.28            | 0.31 | 0.03              | 0.30 | -0.31                | 0.03 | -3.54           | 0.52 |
| Leu280                            | -2.14           | 0.33 | 0.26            | 0.10 | -0.15             | 0.11 | -0.21                | 0.05 | -2.24           | 0.38 |
| Thr316                            | -1.47           | 0.23 | -0.14           | 0.39 | 0.48              | 0.46 | -0.28                | 0.04 | -1.40           | 0.29 |
| Leu323                            | -1.15           | 0.32 | -0.03           | 0.06 | 0.23              | 0.09 | -0.25                | 0.05 | -1.19           | 0.33 |
| Leu287                            | -1.10           | 0.26 | -0.04           | 0.04 | 0.21              | 0.11 | -0.09                | 0.02 | -1.03           | 0.31 |
| Phe284                            | -1.08           | 0.24 | 0.02            | 0.07 | 0.28              | 0.09 | -0.04                | 0.02 | -0.81           | 0.29 |
| Phe207                            | -0.72           | 0.17 | 0.14            | 0.06 | -0.15             | 0.11 | -0.01                | 0.00 | -0.74           | 0.19 |
| Gly210                            | -0.69           | 0.21 | -0.47           | 0.11 | 0.58              | 0.14 | -0.07                | 0.02 | -0.65           | 0.26 |
| Glu209                            | -0.71           | 0.15 | 0.15            | 0.16 | 0.03              | 0.39 | -0.08                | 0.02 | -0.61           | 0.35 |
| Val279                            | -0.56           | 0.11 | 0.43            | 0.08 | -0.45             | 0.09 | -0.01                | 0.01 | -0.60           | 0.11 |
| Phe160                            | -0.46           | 0.18 | -0.002          | 0.04 | -0.05             | 0.08 | -0.07                | 0.03 | -0.58           | 0.23 |
| Leu319                            | -0.52           | 0.14 | -0.15           | 0.05 | 0.15              | 0.09 | -0.05                | 0.02 | -0.56           | 0.14 |
| Phe362                            | -0.48           | 0.14 | -0.02           | 0.04 | 0.03              | 0.06 | -0.05                | 0.02 | -0.51           | 0.16 |

  

| <b>MTIP-CRF<sub>1</sub>R</b> |                 |      |                 |      |                   |      |                      |      |                 |      |
|------------------------------|-----------------|------|-----------------|------|-------------------|------|----------------------|------|-----------------|------|
| <b>Residue</b>               | <b>VDW (SD)</b> |      | <b>ELE (SD)</b> |      | <b>POLAR (SD)</b> |      | <b>NONPOLAR (SD)</b> |      | <b>TOT (SD)</b> |      |
| Phe203                       | -2.69           | 0.34 | -0.40           | 0.12 | -1.04             | 0.27 | -0.19                | 0.02 | -4.32           | 0.38 |
| Met206                       | -3.83           | 0.40 | -0.27           | 0.33 | 0.89              | 0.34 | -0.34                | 0.03 | -3.54           | 0.48 |
| Asn283                       | -2.91           | 0.55 | -2.96           | 0.76 | 3.36              | 0.55 | -0.20                | 0.02 | -2.72           | 0.94 |
| Leu287                       | -2.00           | 0.38 | -0.67           | 0.19 | 0.21              | 0.13 | -0.12                | 0.03 | -2.57           | 0.54 |
| Thr316                       | -1.70           | 0.37 | -0.47           | 0.23 | -0.17             | 0.42 | -0.20                | 0.04 | -2.54           | 0.60 |
| Leu280                       | -2.09           | 0.35 | 0.61            | 0.12 | -0.50             | 0.10 | -0.17                | 0.03 | -2.15           | 0.41 |
| Leu320                       | -1.40           | 0.65 | -0.05           | 0.07 | -0.09             | 0.12 | -0.12                | 0.06 | -1.66           | 0.65 |
| Leu323                       | -1.19           | 0.32 | -0.08           | 0.05 | 0.16              | 0.09 | -0.20                | 0.04 | -1.31           | 0.34 |
| Leu213                       | -0.64           | 0.22 | -0.29           | 0.13 | -0.17             | 0.08 | -0.05                | 0.02 | -1.16           | 0.27 |
| Phe362                       | -0.66           | 0.20 | -0.04           | 0.05 | -0.18             | 0.09 | -0.04                | 0.02 | -0.92           | 0.30 |
| Phe284                       | -1.02           | 0.27 | 0.16            | 0.21 | 0.17              | 0.16 | -0.03                | 0.01 | -0.72           | 0.23 |
| Ile290                       | -0.50           | 0.24 | -0.05           | 0.06 | -0.11             | 0.05 | -0.03                | 0.01 | -0.69           | 0.26 |
| Phe162                       | -0.53           | 0.15 | -0.01           | 0.02 | -0.04             | 0.08 | -0.09                | 0.03 | -0.67           | 0.21 |
| Val313                       | -0.54           | 0.20 | -0.08           | 0.09 | -0.01             | 0.09 | -0.03                | 0.01 | -0.66           | 0.26 |
| Gly210                       | -0.77           | 0.29 | -0.03           | 0.21 | 0.26              | 0.14 | -0.07                | 0.02 | -0.62           | 0.40 |
| Phe207                       | -0.72           | 0.13 | 0.19            | 0.07 | -0.05             | 0.10 | -0.01                | 0.00 | -0.58           | 0.15 |
| Val279                       | -0.59           | 0.11 | 0.44            | 0.09 | -0.40             | 0.08 | -0.01                | 0.00 | -0.56           | 0.13 |
| Leu319                       | -0.53           | 0.17 | 0.21            | 0.06 | -0.16             | 0.08 | -0.04                | 0.02 | -0.52           | 0.18 |
